# Supplementary material for: A kinase to cytokine explorer to identify molecular regulators and potential therapeutic opportunities
Source: eLife. 2024 Feb 2;12:RP91472. doi: 10.7554/eLife.91472 (PMC10945549; doi:10.7554/eLife.91472)
Supplement: Supplementary file 1. [file elife-91472-supp1.xlsx]

## Sheet: Table_S1_Fold change
Supplementary File 1 Fold change of average cytokine level in LPS-treated macrophage compared to control (PBS-treated macrophage)
Cytokine	FC(LPS/PBS)
Activin A	1
AITRL (GITR Ligand)	1
alpha-Synuclein	1
Amphiregulin	1
Amyloid beta	1
APRIL	1
BAFF	1
BCMA (TNFRSF17)	1
BDNF	1
BMP2	1
BMP3	1
BMP4	1
BMP6	1
BMP7	1
BMP9	1
C5/C5a	1
Calbindin	1
CCL1	0.971917
CCL11	1
CCL13	0.748642
CCL14	1
CCL15	3.23708
CCL16	1
CCL17	5.41857
CCL18	2.25753
CCL19	107.477
CCL2	1
CCL20	1
CCL21	1
CCL22	0.874574
CCL23	1
CCL24	0.255882
CCL25	1
CCL26	1
CCL27	1
CCL28	1
CCL3	6.12383
CCL4	11.5258
CCL5	21.8476
CCL7	4.97679
CCL8	2.55023
CD14	1.44304
CD163	1
CD276 (B7-H3)	1
CD27L	1
CD30	1
CD40L	1
CNTF	1
CRP	1
CX3CL1	1
CXCL1	6.45641
CXCL10	1.70047
CXCL11	1
CXCL12 (alpha)	1
CXCL12 (beta)	1
CXCL13	39.547
CXCL14	1
CXCL16	1.12979
CXCL17	1
CXCL3	0.8
CXCL4	1
CXCL5	13.9634
CXCL6	1
CXCL7	6.55951
CXCL9	2.65735
Cytochrome C	1
EGF	1
EGFR	1
EMMPRIN	1.49355
FAS-L	1
FGF-1	1
FGF-19	1
FGF-2	1
FGF-21	1
FGF-4	1
FGF-6	1
FGF-7 (KGF)	1
FGF-9	1
FGFR3 (IIIc)	0.899226
FLRG (FSTL3)	1
Flt-3 Ligand	1
G-CSF	2.35694
GDF-11 (BMP-11)	1
GDF-15 (MIC-1)	1
GDNF	1
GM-CSF	1
Granzyme B	1
Growth Hormone (Somatotropin)	1
HGF	1
HVEM	1
ICAM-1	4.11463
ICAM-2	1
IFN alpha 2 (alpha 2b)	1
IFN beta	1
IFN gamma	1
IFN-epsilon	1
IGF-1	1
IL-1 alpha	1
IL-1 beta	1.32936
IL-1 R1	1
IL-1 RA/RN	4.39154
IL-10	15.4723
IL-11	1
IL-12 p35	1
IL-12 p40	47.4566
IL-12 p70	1
IL-15	1
Il-15/IL-15R alpha complex	1
IL-16	1
IL-17A	1
IL-17B	1
IL-17C	1
IL-17D	1
IL-17E (IL-25)	1
IL-17F	1
IL-18	0.968818
IL-2	1
IL-2 RA	1
IL-21	1
IL-22	1
IL-22 BP	1
IL-23	1
IL-24	1
IL-27	1.69647
IL-28A	1
IL-29	1
IL-3	1
IL-31	1
IL-32 (alpha)	1
IL-33	1
IL-35	1
IL-4	1
IL-5	1
IL-6	16.1858
IL-6 R alpha	1
IL-7	1
IL-8	1.30208
IL-9	1
Leptin	1
LIF	1
LOX1 (OLR1)	1
M-CSF	1
M-CSF R (CD115)	1.54512
Mesothelin	0.721051
MIF	1.29963
MMP-1	2.46408
MMP-10	1
MMP-12	1
MMP-2	1
MMP-3	1
MMP-7	1.26058
MMP-9	0.578228
NF-L	1
NGF beta	1
NRG1 beta 1	1
Oncostatin M (OSM)	1
Osteopontin (OPN)	0.686608
PDGF-BB	0.846421
PLGF	1
Procalcitonin	1
PTX3 (Pentraxin 3)	1
Resistin	1
SAA	1
SCF	1
ST2 (IL-33R)	1.21493
TGF-beta 1 (LAP domain in precursor)	1
TGF-beta 1 (total)	1
TGF-beta 2	1
TGF-beta 3	0.888002
Tie-2	0.718644
TIMP1	1.61866
Tissue Factor (TF)	1
TNF alpha	5.0217
TNF beta	1
TNF RI	1
TNF RII	2.59439
TNF RIII (Lymphotoxin Beta R)	1
TPO (Thrombopoietin)	1
TRAIL	1
TREM2	1.02987
TSLP	1
TWEAK	1
uPA	1
VCAM-1	1
VEGF Receptor 2 (Flk-1)	1
VEGF-A (165)	6.643
VEGF-C	1
VEGF-D	1
VEGFR-1	1
WISP-1 (CCN4)	1
XCL1 (Lymphotactin)	1

## Sheet: Raw data
Supplementary File 1 Cytokine level (pg/mL) for all LPS treated and PBS treated macrophage samples
Sample	protein_name	Activin A	AITRL (GITR Ligand)	alpha-Synuclein	Amphiregulin	Amyloid beta	APRIL	BAFF	BCMA (TNFRSF17)	BDNF	BMP2	BMP3	BMP4	BMP6	BMP7	BMP9	C5/C5a	Calbindin	CCL1	CCL11	CCL13	CCL14	CCL15	CCL16	CCL17	CCL18	CCL19	CCL2	CCL20	CCL21	CCL22	CCL23	CCL24	CCL25	CCL26	CCL27	CCL28	CCL3	CCL4	CCL5	CCL7	CCL8	CD14	CD163	CD276 (B7-H3)	CD27L	CD30	CD40L	CNTF
Sample1	LPS	125.62	376.99	6326.87	9.73	27620	1.73	20061	15.2	26.39	268.27	96046.5	14.32	1607.58	160.72	3.96	1.54	130.05	83.8	6.7	3.79	3.58	796.38	20.29	49.37	108.44	1302.76	6839.29	21.84	78.1	5.77	312.95	13.39	313.02	1151.61	524.33	103.07	4138.38	19418.8	1250.86	340.78	868.78	3579.9	10613	463.48	2009.73	2184.9	15.27	174.12
Sample2	LPS	125.62	376.99	6326.87	9.73	27620	1.73	20061	15.2	26.39	268.27	96046.5	14.32	1607.58	160.72	3.96	1.54	130.05	70.95	6.7	3.79	3.58	651.29	20.29	12.2	49.19	919.3	6839.29	21.84	78.1	5.77	312.95	13.39	313.02	1151.61	524.33	103.07	4405.88	19616.3	1103.01	155.46	1084.24	3315	10613	463.48	2009.73	2184.9	15.27	174.12
Sample3	LPS	125.62	376.99	6326.87	9.73	27620	1.73	20061	15.2	26.39	268.27	96046.5	14.32	1607.58	160.72	3.96	1.54	130.05	89.69	6.7	3.79	3.58	592.58	20.29	14.34	40.54	944.5	6839.29	21.84	78.1	5.77	312.95	13.39	313.02	1151.61	524.33	103.07	3661.73	18285.5	734.98	101.73	1063.83	2711.07	10613	463.48	2009.73	2184.9	15.27	174.12
Sample4	LPS	125.62	376.99	6326.87	9.73	27620	1.73	20061	15.2	26.39	268.27	96046.5	14.32	1607.58	160.72	3.96	1.54	130.05	95.05	6.7	3.79	3.58	552.53	20.29	21.28	48.27	1037.53	6839.29	21.84	78.1	5.77	312.95	13.39	313.02	1151.61	524.33	103.07	2760.62	19147	1224.5	150.72	19959	3393.82	10613	463.48	2009.73	2184.9	15.27	174.12
Sample5	LPS	125.62	376.99	6326.87	9.73	27620	1.73	20061	15.2	26.39	268.27	96046.5	14.32	1607.58	160.72	3.96	1.54	130.05	89.07	6.7	3.79	3.58	445.35	20.29	19.08	45.97	900.25	6839.29	21.84	78.1	5.77	312.95	13.39	313.02	1151.61	524.33	103.07	3044.37	19245.7	1455.96	130.78	19959	3235.17	10613	463.48	2009.73	2184.9	15.27	174.12
Sample6	LPS	125.62	376.99	6326.87	9.73	27620	1.73	20061	15.2	26.39	268.27	96046.5	14.32	1607.58	160.72	3.96	1.54	130.05	103	6.7	3.79	3.58	543.67	20.29	17.17	53.65	799.76	6839.29	21.84	78.1	5.77	312.95	13.39	313.02	1151.61	524.33	103.07	3973.8	22340.7	1024.57	226.86	462.21	3090.54	10613	463.48	2009.73	2184.9	15.27	174.12
Sample7	LPS	125.62	376.99	6326.87	9.73	27620	1.73	20061	15.2	26.39	268.27	96046.5	14.32	1607.58	160.72	3.96	1.54	130.05	109.5	6.7	3.79	3.58	329.37	20.29	14.1	44.41	685.22	6839.29	21.84	78.1	5.77	312.95	13.39	313.02	1151.61	524.33	103.07	4817.91	15681.9	1144.25	183.22	876.68	3350.22	10613	463.48	2009.73	2184.9	15.27	174.12
Sample8	LPS	125.62	376.99	6326.87	9.73	27620	1.73	20061	15.2	26.39	268.27	96046.5	14.32	1607.58	160.72	3.96	1.54	130.05	111.68	6.7	3.79	3.58	429.01	20.29	14.15	52.21	865.26	6839.29	21.84	78.1	5.77	312.95	13.39	313.02	1151.61	524.33	103.07	5517.05	23065.8	1011.54	205.03	921.88	3688.03	10613	463.48	2009.73	2184.9	15.27	174.12
Sample9	PBS	125.62	376.99	6326.87	9.73	27620	1.73	20061	15.2	26.39	268.27	96046.5	14.32	1607.58	160.72	3.96	1.54	130.05	132.79	6.7	3.79	3.58	140.71	20.29	3.73	24.13	8.67	6839.29	21.84	78.1	12.39	312.95	97.11	313.02	1151.61	524.33	103.07	693.64	1648	50.37	46.26	757.77	1937.58	10613	463.48	2009.73	2184.9	15.27	174.12
Sample10	PBS	125.62	376.99	6326.87	9.73	27620	1.73	20061	15.2	26.39	268.27	96046.5	14.32	1607.58	160.72	3.96	1.54	130.05	100.73	6.7	3.79	3.58	133.6	20.29	3.73	25.3	8.67	6839.29	21.84	78.1	5.77	312.95	54.49	313.02	1151.61	524.33	103.07	570.38	1841.9	49.56	36.85	12676.3	2329.45	10613	463.48	2009.73	2184.9	15.27	174.12
Sample11	PBS	125.62	376.99	6326.87	9.73	27620	1.73	20061	15.2	26.39	268.27	96046.5	14.32	1607.58	160.72	3.96	1.54	130.05	88.06	6.7	3.79	3.58	142.12	20.29	3.73	21.34	8.67	6839.29	21.84	78.1	5.77	312.95	37.99	313.02	1151.61	524.33	103.07	507.99	1679.02	44.82	35.81	673.81	1930.48	10613	463.48	2009.73	2184.9	15.27	174.12
Sample12	PBS	125.62	376.99	6326.87	9.73	27620	1.73	20061	15.2	26.39	268.27	96046.5	14.32	1607.58	160.72	3.96	1.54	130.05	95.02	6.7	3.79	3.58	131.49	20.29	3.73	22.2	8.67	6839.29	21.84	78.1	5.77	312.95	42.48	313.02	1151.61	524.33	103.07	477.9	1656.9	45.76	31.2	1076.63	2270.83	10613	463.48	2009.73	2184.9	15.27	174.12
Sample13	PBS	125.62	376.99	6326.87	9.73	27620	1.73	20061	15.2	26.39	268.27	96046.5	14.32	1607.58	160.72	3.96	1.54	130.05	90.15	6.7	3.79	3.58	210.65	20.29	3.73	24.44	8.67	6839.29	21.84	78.1	5.77	312.95	50.27	313.02	1151.61	524.33	103.07	652.43	1858.89	54.79	34.07	706.27	2135.68	10613	463.48	2009.73	2184.9	15.27	174.12
Sample14	PBS	125.62	376.99	6326.87	9.73	27620	1.73	20061	15.2	26.39	268.27	96046.5	14.32	1607.58	160.72	3.96	1.54	130.05	97.33	6.7	3.79	3.58	151.48	20.29	3.73	26.03	8.67	6839.29	21.84	78.1	5.77	312.95	43.98	313.02	1151.61	524.33	103.07	787.22	1586.68	56.64	37.65	612.81	1865.54	10613	463.48	2009.73	2184.9	15.27	174.12
Sample15	PBS	125.62	376.99	6326.87	9.73	27620	1.73	20061	15.2	26.39	268.27	96046.5	14.32	1607.58	160.72	3.96	1.54	130.05	79.99	6.7	9.64	3.58	207.75	20.29	3.73	25.42	8.67	6839.29	21.84	78.1	5.77	312.95	44.24	313.02	1151.61	524.33	103.07	730.93	1546.27	55.6	39.2	607.86	2691.01	10613	463.48	2009.73	2184.9	15.27	174.12
Sample16	PBS	125.62	376.99	6326.87	9.73	27620	1.73	20061	15.2	26.39	268.27	96046.5	14.32	1607.58	160.72	3.96	1.54	130.05	90.42	6.7	8.12	3.58	222.97	20.29	3.73	27.23	8.67	6839.29	21.84	78.1	5.77	312.95	48.07	313.02	1151.61	524.33	103.07	857.21	1786.7	52.1	39.27	610.68	3109.08	10613	463.48	2009.73	2184.9	15.27	174.12
[truncated: 143 more columns]
